# Supplementary material for: Cell proliferation and migration mechanism of caffeoylserotonin and serotonin via serotonin 2B receptor in human keratinocyte HaCaT cells
Source: PubMed Central journal article supplement — BMB Rep. 2018 Apr 30;51(4):188–93. doi: 10.5483/BMBRep.2018.51.4.209 (PMC5933214; doi:10.5483/bmbrep.2018.51.4.209), 2018-04-30
Supplement: bmb-51-188_suppl.pdf [file bmb-51-188_suppl.pdf]

1 **Cell Proliferation and Migration Mechanism of Caffeoylserotonin and Serotonin**  
2 **via Serotonin 2B receptor in Human Keratinocyte HaCaT cells**

3  
4 Hye-Eun Kim *et al.*

5  
6 **Supplementary Materials and Methods**

7  
8 *Reagents*

9 A FITC BrdU Flow kit assay kit was purchased from BD Pharmingen™ (San Jose,  
10 CA, USA). CaS was synthesized by mixing activated esters of hydroxycinnamic acids  
11 with serotonin hydrochloride in an alkaline solution as described previously (4). 5-HT  
12 and all other reagents were purchased from Sigma-Aldrich (St. Louis, MO, USA)  
13 unless otherwise specified. Anti-cyclin D1, cyclin E, p-Rb, c-Myc, c-Fos, 5HTR2B,  
14 MMP9, anti-β-actin, and horseradish peroxidase (HRP)-conjugated anti-goat, anti-  
15 mouse, and anti-rabbit IgG antibodies were purchased from Santa Cruz Biotechnology  
16 (Santa Cruz, CA, USA). p-GSK3 and GSK3 antibodies were bought from BioVison  
17 (Milpitas, CA, USA). Anti-p-Akt, Akt, p-ERK1/2, ERK1/2, p-p38, p38, p-JUK, and  
18 JNK antibodies were obtained from Cell Signaling Technology (Beverly, MA, USA).  
19 For RNA isolation, TRI reagent was purchased from MRC Inc. (Cincinnati, OH, USA).  
20 Maxime RT-PCR PreMix Kit was purchased from iNtRON (Sungnam, Korea).

21  
22 *Cell culture*

23 Human keratinocyte HaCaT cells were cultured in Dulbecco's modified Eagle medium  
24 (DMEM) supplemented with 10% fetal bovine serum (FBS), penicillin (100 U/mL),

1 and streptomycin (100 µg/mL) at 37°C and 5% CO<sub>2</sub> atmosphere.

2

### 3 *Cell cycle analysis*

4 To induce cell cycle synchronization, cells were brought to quiescence by serum  
5 starvation (medium without FBS) for at least 48 h or 0.1 M hydroxyurea for G1 arrest  
6 and 100 ng/ml Nocodazole for G2/M arrest. Cultured cells were trypsinized and fixed  
7 with 70% ethanol at 4°C overnight followed by staining with propidium iodide (PI).  
8 DNA contents were analyzed by using Attune acoustic focusing cytometer (Applied  
9 Biosystems, CA, USA). Flow cytometry histogram was further analyzed using Flowjo  
10 (Ashland, OR, USA) to obtain fitting for cell cycle fraction data.

11

### 12 *BrdU incorporation*

13 To confirm that CaS could stimulate S phase entry, DNA synthesis was measured  
14 using a FITC BrdU Flow Kit (BD Pharmingen™, San Jose, CA, USA) according to the  
15 manufacturer's instructions. Briefly, G1 synchronized cells were stimulated with 10 µM  
16 CaS or 5-HT for 24 h. Every 4 hours after the stimulation, cells were labeled with  
17 bromo-deoxy-uridine (BrdU) for 30 min before harvesting. Cell samples were subjected  
18 to FACS analysis of DNA content and BrdU incorporation.

19

### 20 *Semi-quantitative reverse transcription polymerase chain reaction (semi qRT-PCR)*

21 Quiescent HaCaT cells were treated with CaS or 5-HT for 1 h and subjected to total  
22 RNA isolation using TRI reagent (MRC Inc., Cincinnati, OH, USA) according to the  
23 manufacturer's instructions. To analyze c-myc, c-fos, cyclin D1, CDK4, CDK6, cyclin  
24 E, CDK2 and 5-HT2BR mRNA levels, reverse transcription and cDNA amplification

1 were carried out using 25 ng of isolated total RNA and Maxime RT-PCR PreMix. RT-  
2 PCR was performed in 40 cycles of 94°C for 30s, 60°C for 30s, and 72°C for 60s for c-  
3 myc, c-fos, cyclin D1, CDK6, CDK4, cyclin E, CDK2, and 5-HT2BR. For  $\beta$ -actin  
4 amplification, PCR was performed in 30 cycles of 94°C for 30s, 57°C for 30s, and 72°C  
5 for 60s. Oligonucleotide primers used for semi RT-PCR are listed in Supplementary data  
6 1-2.

7

### 8 *Western blotting*

9 G1-arrested HaCaT cells were pre-incubated with appropriate inhibitors for 30 min as  
10 necessary and then stimulated with CaS or 5-HT for 1 h. These cells were lysed in cold  
11 RIPA buffer (pH 7.4) containing protease inhibitor cocktail. Whole-cell lysate  
12 containing 20  $\mu$ g of protein was subjected to SDS-PAGE and transferred to PVDF  
13 membranes. After blocking, these membranes were incubated with primary antibodies  
14 at 4°C overnight. After being washed, membranes were incubated with secondary  
15 antibodies and subsequently visualized using an enhanced chemiluminescence kit  
16 (Amersham Biosciences, Little Chalfont, UK). Equal loading was assessed using anti-  
17  $\beta$ -actin antibody to normalize the amount of total protein.

18

### 19 *Cell migration assay*

20 For cell migration assay, HaCaT cells were grown to confluence in a 12-well plate,  
21 placed in serum free medium for 24 h, and scratched using 1 mL pipette tip. After  
22 incubating cells with 10  $\mu$ M SB212205, a selective inhibitor of 5-HT2BR, cells were  
23 washed with PBS and refreshed with medium containing 0.5% FBS and CaS or 5-HT.  
24 To prevent apoptosis, cells were incubated in DMEM media containing 0.5% FBS. Cell

1 migration was recorded using a Cannon Power shot G12 (Japan). The area of wound  
2 sealing was calculated using NIH ImageJ software.

3

#### 4 *Transient transfection and luciferase assay*

5 HaCaT cells were plated into 12-well plates at a density of  $1.5 \times 10^5$  cells/mL at 4 hours  
6 before transfection. Transient transfection was performed using Hily Max method  
7 (Dojindo, Japan) with NF- $\kappa$ B dependent luciferase reporter plasmid pNF- $\kappa$ B-Luc (1  $\mu$ g)  
8 or AP-1 dependent luciferase reporter plasmid pAP-1-Luc (1  $\mu$ g) and 20 ng *Renilla*  
9 luciferase expression vector (pRL-TK). pRL-TK was co-transfected to normalize the  
10 transfection efficiency as control. DNA/Hily Max ratio was 1:3 ( $\mu$ g/ $\mu$ L). Cells were  
11 maintained in the presence of this mixture for 4 h and then washed. Cells were then  
12 treated with inhibitors for 30 min and incubated with 10  $\mu$ M CaS or 5-HT for 24 h.  
13 After drug treatments, cells were lysed with 250  $\mu$ L Reporter Lysis Buffer (Promega,  
14 Madison, WI, USA). Luciferase activity from 20  $\mu$ L of lysate was measured using a  
15 luminometer (Molecular Devices, Sunnyvale, CA, USA).

16

#### 17 *Statistical analysis*

18 Values are expressed as mean  $\pm$  SD for three independent experiments. Statistical  
19 significance in pairwise comparison was evaluated using Student's *t*-test. Statistical  
20 differences were determined with analysis of variance (ANOVA) using SPSS 12.0 K  
21 (Chicago, IL, USA). *P* values  $< 0.05$  were considered statistically significant.

22

23

1 **Supplementary data**

2

3 **S1. List of primers used for semi RT-PCR of cell cycle related genes in HaCaT**  
4 **cells**

| Gene      | Forward (5'→3')          | Reverse (5'→3')          | Product size (bp) |
|-----------|--------------------------|--------------------------|-------------------|
| c-myc     | GATTCTCTGCTCTCCTCGACGGAG | GCGCTGCGTAGTTGTGCTGATGTG | 274               |
| c-fos     | TTACTACCACTCACCCGCAGACTC | TGGAGTGTATCAGTCAGCTCCCTC | 414               |
| Cyclin D1 | ACCTGGATGCTGGAGGTCTG     | GAACTTCACATCTGTGGCACA    | 402               |
| CDK4      | TGCTGCAGAGCTCGAAAGGCA    | CCTGTGGACATGTGGAGTGTGGC  | 296               |
| CDK6      | CGAGGTGTTCTGGCTGGGCG     | TGGACGTGATTGGACTCCAGGA   | 269               |
| Cyclin E  | GGTGAGGAGCCCCTGGGGA      | ACTTGCTGCTTCGGCCTTGT     | 292               |
| CDK2      | CTCACTGGAATCCTCTTCCC     | AACTTTACTAAAATCTTGCCG    | 468               |
| β-actin   | GGACTTCGAGCAAGAGATGG     | AGCACTGTGTTGGCGTACAG     | 243               |

5

6 Human keratinocyte HaCaT cells were cultured in 10% DMEM for 24 h and then  
7 subjected to total RNA isolation using TRI reagent according to the manufacturer's  
8 instructions. To confirm mRNA expression levels of cell cycle related genes, reverse  
9 transcription and cDNA amplification were carried out with 25 ng of isolated total RNA  
10 using a Maxime RT-PCR PreMix. The reaction was cycled 40 times for c-myc, c-fos,  
11 cyclin D1, CDK6, CDK4, cyclin E, CDK2, and 5-HT2B with the following program:  
12 30s at 94°C, 30s at 60°C, and 60s at 72°C. The reaction for β-actin was cycled 30 times  
13 with the following PCR program: 30s at 94°C, 30s at 57°C, and 60s at 72°C.

14

1 **S2. List of primers used for semi RT-PCR of 13 HTRs in HaCaT cells**

| Gene   | Forward (5'→3')        | Reverse (5'→3')      | Product size (bp) |
|--------|------------------------|----------------------|-------------------|
| 5HTR1A | CCGCCTCTTTCGAGAGGAAA   | GTTGGAGTAGCCCAGCCAAT | 224               |
| 5HTR1B | AGTCAAAGTGCGAGTCTCCG   | GGAGTTGAGATAGCCCAGCC | 220               |
| 5HTR1D | CCCTGGAACGCAAGAGGATT   | GCCTTCCGAAAGGGACAAT  | 274               |
| 5HTR1E | CTCCACCTCAGACCCTACCA   | TCCGAGGACACGGTGTAGAT | 231               |
| 5HTR1F | GAGGTGAATGGCCAAGTCCT   | TGGCTGCTTCCGTTCTCTT  | 202               |
| 5HTR2A | GTTTGTGGTGATGTGGTGCC   | CTTGTAGGCCAAAGCCGGTA | 268               |
| 5HTR2B | ACATTTCCGGGATGCATTTGGC | ATGGTTGAACTTCGGAGCCT | 253               |
| 5HTR2C | CCGAAGGGCATTCTCCAAC    | TTCGCTAACCACACTGGAGG | 235               |
| 5HTR3A | GGAGAGAATCGCCTGGCTAC   | AATTGCCGGATGGAGGACAG | 240               |
| 5HTR3B | TGCATGGCCTTCTTGTTCT    | CCTGTTGGTCTGTCTGGTCC | 280               |
| 5HTR4  | AGGACAGAGACCAAAGCAGC   | TCGGTAGCGCTCATCATCAC | 303               |
| 5HTR6  | CCACTCTTCATGCGGGACTT   | GAAGAAATTGACGGCGGCAG | 252               |
| 5HTR7  | TGTGCTGGCTGCCATTTTC    | AGGTCTCTCTGGCCTCTCAG | 272               |

2

3 Human keratinocyte HaCaT cells were cultured in 10% DMEM for 24 h and then  
 4 subjected to total RNA isolation using TRI reagent according to the manufacturer's  
 5 instructions. To confirm mRNA expression levels of 13 serotonin receptors, reverse  
 6 transcription and cDNA amplification were carried out with 25 ng of isolated total RNA  
 7 using a maxime RT-PCR PreMix. The reaction was cycled 40 times for 13 serotonin  
 8 receptors with the following PCR program: 30s at 94°C, 30s at 60°C, and 60s at 72°C.  
 9 The reaction for  $\beta$ -actin was cycled 30 times with the following PCR program: 30s at  
 10 94°C, 30s at 57°C, and 60s at 72°C.

11

1

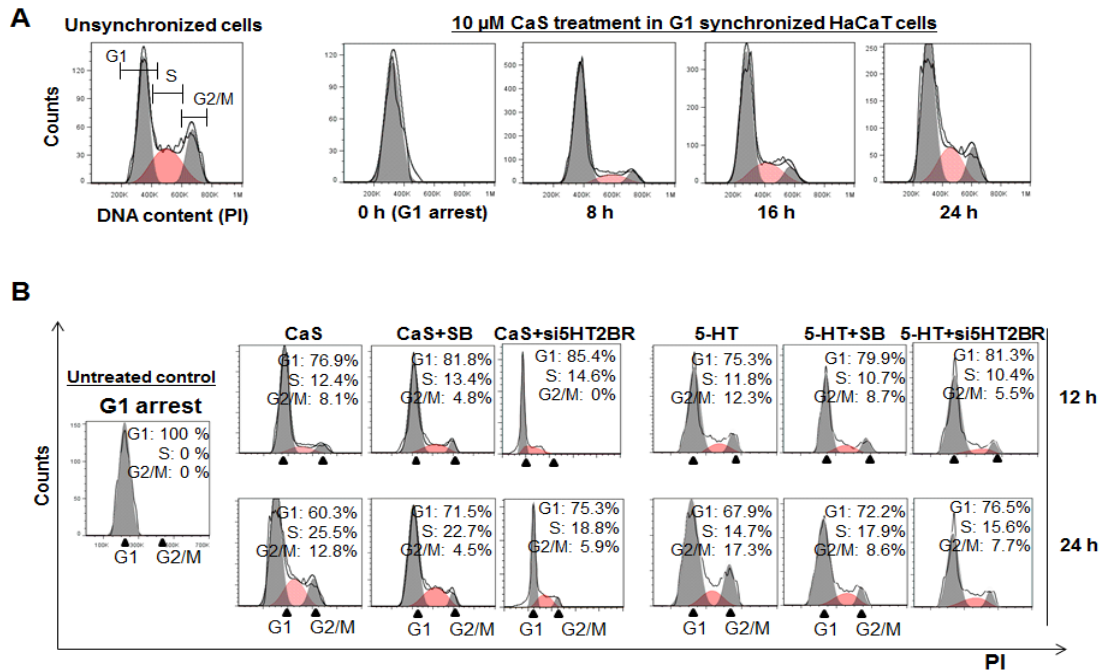

2

3

4 **S3. Cell cycle analysis of HaCaT cells under various conditions.** (A) Cell cycle

5 analysis of HaCaT cells treated with CaS. FACS analysis of DNA content in HaCaT  
6 after PI staining. DNA profile of unsynchronized cells is presented in the left panel.

7 Gates used to define cells in G1, S, or G2/M are indicated in this panel. Cells were  
8 synchronized in G1 phase (G1 arrest, 0 h) and released in the presence of CaS. Cell  
9 were then harvested for FACS analysis at different time points. (B) Effect of inhibitor

10 and siRNA for 5-HT2BR on G1 progression induced by CaS or 5-HT. HaCaT cells  
11 synchronized at G1 arrest by serum starvation were pretreated with 10  $\mu$ M SB215505  
12 before treatment with CaS or 5-HT for 24 h. CaS or 5-HT treated cells were fixed and  
13 stained with PI and analyzed by FACS.

14

1

2

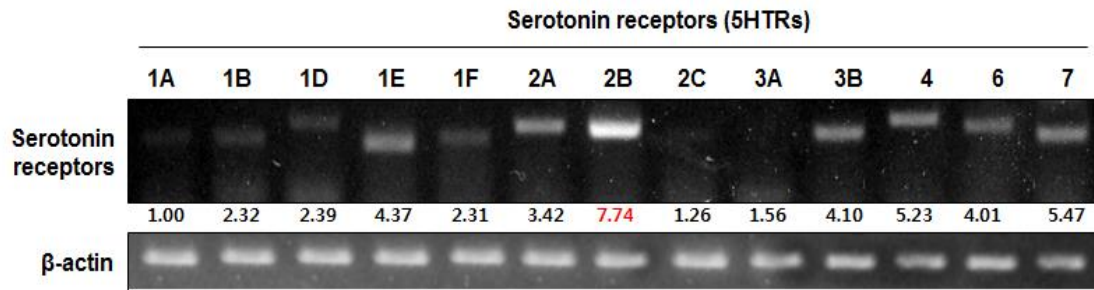

3

4

5 **S4. RT-PCR analyses for 13 serotonin receptors for indicated time.** Oligonucleotide  
6 primers and semi RT-PCR conditions which used in this experiment were the same as  
7 those explained in S2. β-actin was used as a loading control. Serotonin (5-HT) actions  
8 are mediated that through interactions with membrane-bound receptors that can be  
9 categorized into seven families with 13 subtypes, including 5-HT2B and 5-HT7  
10 receptors that are generally detected in normal and pathologic human keratinocytes (16).  
11 In the current study, 5-HT2B mRNA was found in the majority of HaCaT cells at basal  
12 level.

13



1

2

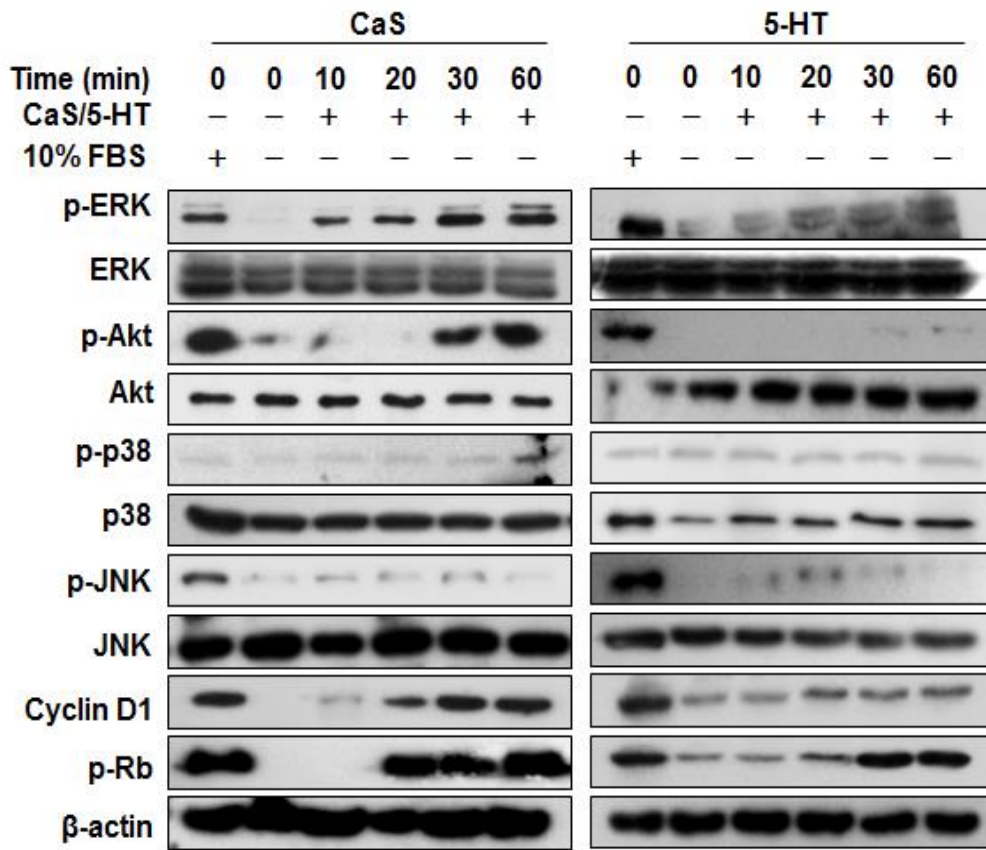

3

4

5 **S5. Western blotting analysis for various proteins related to cell signaling**

6 **pathways.** CaS stimulated both p-ERK and p-Akt. However, 5-HT only stimulated p-

7 ERK. p-Akt was observed only at detectable level. Moreover, there was no significant

8 alteration in JNK or p38 pathway after 5-HT or CaS treatment. Protein expression

9 levels of cyclin D1 and p-Rb in this figure provided clear comparison. . β-actin was

10 used as a loading control.

11

1

2

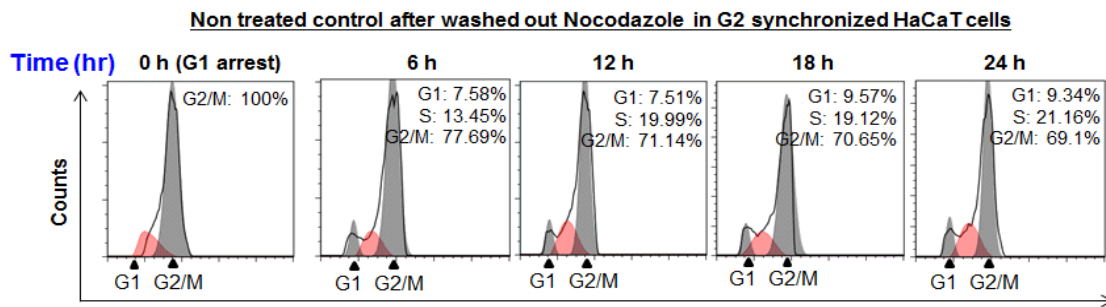

3

4

5 **S6.** HaCaT cells arrested at G2/M were released simply by washing of nocodazole even  
6 without FBS, CaS or 5-HT. However, the portions of G1 was less than 10% of whole  
7 cells even after 24 h, and percent of the G2/M remained about 70% until 24 h after  
8 remove out nocodazole.

9

1

2

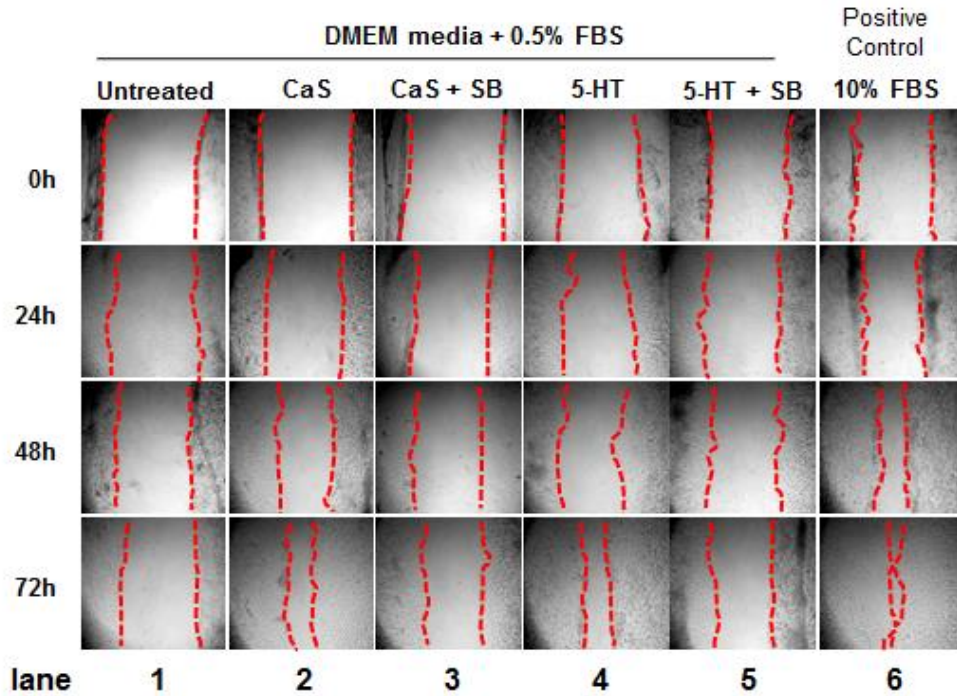

3

4

5

6

7

8

9

10

**S7. Time-lapse analysis of wound healing in HaCaT cells.** HaCaT cells were pre-treated with 10  $\mu$ M SB215505. HaCaT monolayer was then scratched (dotted line) with a 1 mL pipette tip and cultured with 5-HT or CaS for indicated time period. HaCaT cells were cultured in DMEM media containing 0.5% FBS to avoid serum starvation induced cell apoptosis. Magnification, x20.

1

2

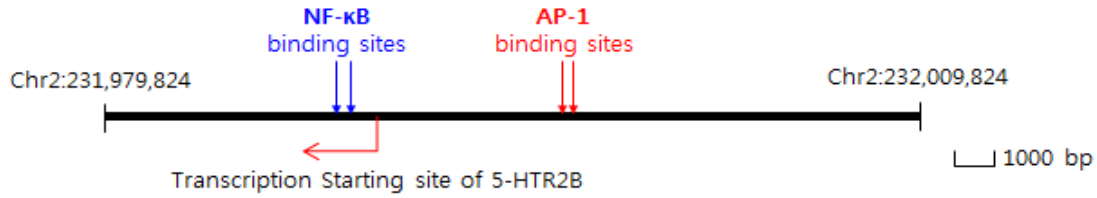

| Transcription factor | Binding position          | Strand | Binding Sequence |
|----------------------|---------------------------|--------|------------------|
| NF-κB                | chr2: 231988258-231988270 | -      | AGGGTATTTCCAC    |
| NF-κB                | chr2: 231988832-231988844 | -      | CAGAGAGTTCCCC    |
| AP-1                 | chr2: 231997033-231997042 | +      | TGTGAGTCAG       |
| AP-1                 | chr2: 231996656-231996669 | +      | AGAATGTGTCAGAG   |

3

4

5

6

**S8. The putative AP-1 and NF-κB motifs in the promoter region of the human 5-**

7

**HT2BR gene.** 5-HT increased both mRNA and protein expression of 5-HT2BR in

8

human keratinocyte HaCaT cells. Both CaS and 5-HT significantly increased AP-1

9

levels. Moreover, CaS increased NF-κB level as well as AP-1 (Fig. 4). This diagram

10

and table depicts the putative AP-1 and NF-κB motifs in the promoter region of the

11

human 5-HT2BR gene. Therefore we suggest that 5-HT can stimulate the expression of

12

5-HT2BR via an AP-1-dependent mechanism. In addition, CaS may stimulate 5-

13

HT2BR expression through both only AP-1 also NF-κB.

14

1

2

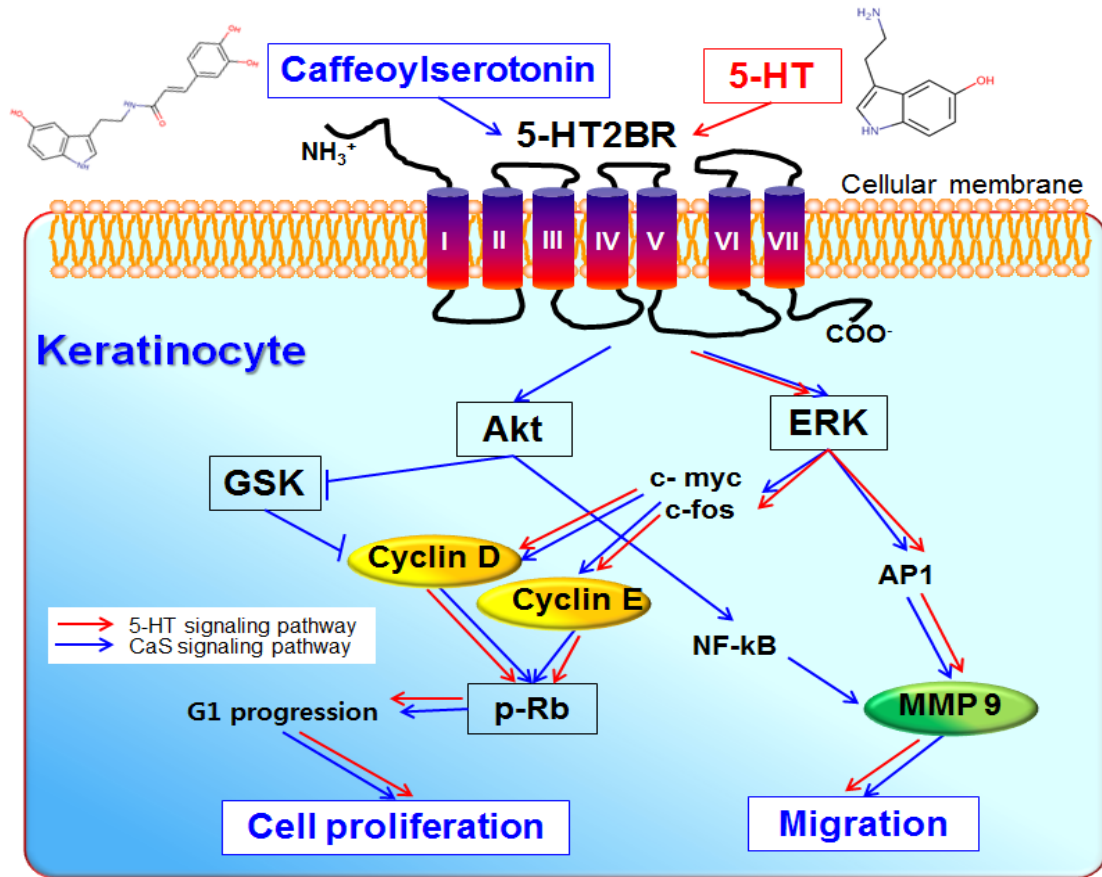

3

4

5 **S9. Schematic representation describing putative pathway involved in CaS or 5-**

6 **HT induced G1 progression and cell migration via 5-HT2BR.** Both cell proliferation

7 and cell migration induced by CaS or 5-HT are regulated by 5-HT2BR. However, CaS

8 could stimulate cell proliferation and cell migration through both ERK and Akt

9 pathways whereas 5-HT could stimulate cell proliferation and cell migration mainly

10 through ERK pathway.

11
